# Supplementary material
Source: Springer Nature journal article supplement (https://www.springermedizin.de/resource/supplementary/12936_2014_3711_MOESM5_ESM.pdf/9545182)

**A****N-terminal**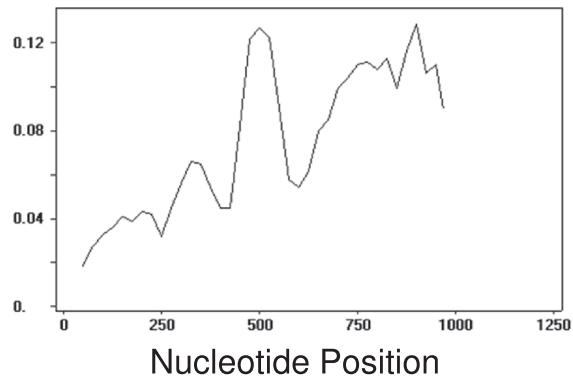**B****N-terminal**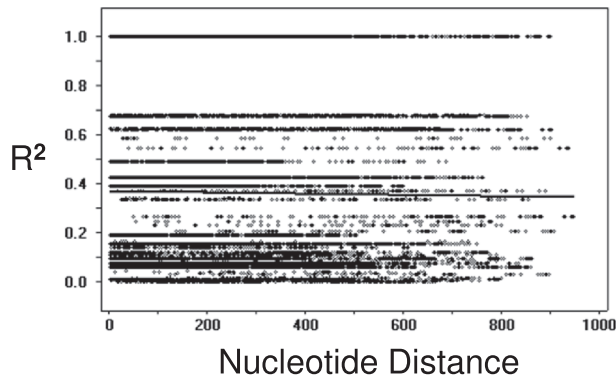 $\pi$ **C-terminal**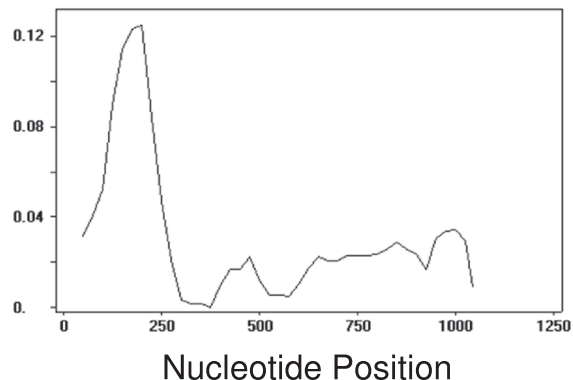**C-terminal**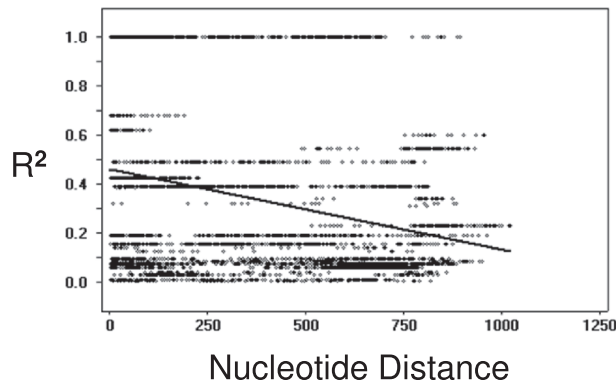

Nucleotide Distance

Supplement: MOESM5 [file 9545182]
